# Supplementary material for: Nine cyanide-bridged bimetallic magnetic chains derived from octacyanomolybdate(v) and lanthanide(iii) building blocks
Source: Royal Society of Chemistry journal article supplement (doi:10.1039/c3ce41048j), 2013-01-01
Supplement: c3ce41048j.pdf [file c3ce41048j.pdf]

## Supplementary Information

**Table S1** Selected bond distances (Å) and angles (°) for complexes **1-9**

Complex **1**

|                 |           |                   |          |
|-----------------|-----------|-------------------|----------|
| C(1)-Mo(1)      | 2.141(9)  | N(4)-Pr(1)        | 2.625(7) |
| C(2)-Mo(1)      | 2.166(10) | O(1)-Pr(1)        | 2.415(7) |
| C(3)-Mo(1)      | 2.174(13) | O(2)-Pr(1)        | 2.379(7) |
| C(4)-Mo(1)      | 2.162(7)  | O(3)-Pr(1)        | 2.432(7) |
| C(5)-Mo(1)      | 2.187(14) | O(4)-Pr(1)        | 2.440(7) |
| C(6)-Mo(1)      | 2.173(10) | O(5)-Pr(1)        | 2.484(9) |
| C(7)-Mo(1)      | 2.150(10) | O(6)-Pr(1)        | 2.428(8) |
| C(8)-Mo(1)      | 2.178(9)  | Pr(1)-N(1)#2      | 2.608(7) |
|                 |           | N(1)-Pr(1)#1      | 2.608(7) |
| N(1)-C(1)-Mo(1) | 177.1(8)  | C(1)-N(1)-Pr(1)#1 | 170.5(7) |
| N(2)-C(2)-Mo(1) | 178.0(10) | C(4)-N(4)-Pr(1)   | 171.7(9) |
| N(3)-C(3)-Mo(1) | 174.0(14) | C(22)-O(1)-Pr(1)  | 137.2(7) |
| N(4)-C(4)-Mo(1) | 178.1(9)  | C(9)-O(2)-Pr(1)   | 158.2(8) |
| N(5)-C(5)-Mo(1) | 178.6(10) | C(12)-O(3)-Pr(1)  | 126.5(9) |
| N(6)-C(6)-Mo(1) | 178.0(10) | C(13)-O(4)-Pr(1)  | 134.7(8) |
| N(7)-C(7)-Mo(1) | 178.0(12) | C(16)-O(5)-Pr(1)  | 142.3(8) |
| N(8)-C(8)-Mo(1) | 176.6(8)  | C(19)-O(6)-Pr(1)  | 144.2(9) |
| C(1)-Mo(1)-C(7) | 74.2(4)   | O(2)-Pr(1)-O(1)   | 82.3(3)  |
| C(1)-Mo(1)-C(4) | 142.6(3)  | O(2)-Pr(1)-O(6)   | 143.5(3) |
| C(7)-Mo(1)-C(4) | 140.8(3)  | O(1)-Pr(1)-O(6)   | 74.6(3)  |
| C(1)-Mo(1)-C(2) | 76.2(3)   | O(2)-Pr(1)-O(3)   | 77.1(3)  |
| C(7)-Mo(1)-C(2) | 78.6(4)   | O(1)-Pr(1)-O(3)   | 73.5(3)  |
| C(4)-Mo(1)-C(2) | 116.2(4)  | O(6)-Pr(1)-O(3)   | 121.1(3) |
| C(1)-Mo(1)-C(6) | 117.2(4)  | O(2)-Pr(1)-O(4)   | 75.0(3)  |
| C(7)-Mo(1)-C(6) | 72.2(4)   | O(1)-Pr(1)-O(4)   | 144.0(3) |
| C(4)-Mo(1)-C(6) | 76.0(4)   | O(6)-Pr(1)-O(4)   | 137.6(3) |
| C(2)-Mo(1)-C(6) | 141.8(4)  | O(3)-Pr(1)-O(4)   | 74.4(3)  |
| C(1)-Mo(1)-C(3) | 77.7(4)   | O(2)-Pr(1)-O(5)   | 107.6(3) |
| C(7)-Mo(1)-C(3) | 144.2(4)  | O(1)-Pr(1)-O(5)   | 142.9(3) |
| C(4)-Mo(1)-C(3) | 73.2(4)   | O(6)-Pr(1)-O(5)   | 77.4(3)  |
| C(2)-Mo(1)-C(3) | 73.6(4)   | O(3)-Pr(1)-O(5)   | 143.1(3) |
| C(6)-Mo(1)-C(3) | 141.9(4)  | O(4)-Pr(1)-O(5)   | 71.8(3)  |
| C(1)-Mo(1)-C(8) | 143.7(3)  | O(2)-Pr(1)-N(1)#2 | 143.2(2) |
| C(7)-Mo(1)-C(8) | 79.7(4)   | O(1)-Pr(1)-N(1)#2 | 111.3(3) |
| C(4)-Mo(1)-C(8) | 71.1(3)   | O(6)-Pr(1)-N(1)#2 | 72.7(3)  |
| C(2)-Mo(1)-C(8) | 74.2(4)   | O(3)-Pr(1)-N(1)#2 | 74.7(3)  |
| C(6)-Mo(1)-C(8) | 76.8(4)   | O(4)-Pr(1)-N(1)#2 | 74.9(3)  |
| C(3)-Mo(1)-C(8) | 112.9(4)  | O(5)-Pr(1)-N(1)#2 | 82.4(3)  |
| C(1)-Mo(1)-C(5) | 72.8(4)   | O(2)-Pr(1)-N(4)   | 73.1(2)  |

|                 |          |                   |          |
|-----------------|----------|-------------------|----------|
| C(7)-Mo(1)-C(5) | 111.1(5) | O(1)-Pr(1)-N(4)   | 75.1(3)  |
| C(4)-Mo(1)-C(5) | 79.5(4)  | O(6)-Pr(1)-N(4)   | 73.8(3)  |
| C(2)-Mo(1)-C(5) | 143.0(4) | O(3)-Pr(1)-N(4)   | 138.9(3) |
| C(6)-Mo(1)-C(5) | 72.3(5)  | O(4)-Pr(1)-N(4)   | 122.6(3) |
| C(3)-Mo(1)-C(5) | 80.4(4)  | O(5)-Pr(1)-N(4)   | 74.1(3)  |
| C(8)-Mo(1)-C(5) | 141.5(4) | N(1)#2-Pr(1)-N(4) | 142.5(2) |

Symmetry transformations used to generate equivalent atoms: #1 x, y, z+1; #2 x, y, z-1.

### Complex 2

|                 |           |                   |          |
|-----------------|-----------|-------------------|----------|
| C(1)-Mo(1)      | 2.178(7)  | N(7)-Nd(1)#1      | 2.579(7) |
| C(2)-Mo(1)      | 2.159(8)  | Nd(1)-O(5)        | 2.356(6) |
| C(3)-Mo(1)      | 2.178(10) | Nd(1)-O(3)        | 2.397(7) |
| C(4)-Mo(1)      | 2.158(9)  | Nd(1)-O(4)        | 2.398(6) |
| C(5)-Mo(1)      | 2.175(7)  | Nd(1)-O(6)        | 2.414(7) |
| C(6)-Mo(1)      | 2.139(13) | Nd(1)-O(1)        | 2.417(6) |
| C(7)-Mo(1)      | 2.189(14) | Nd(1)-O(2)        | 2.444(8) |
| C(8)-Mo(1)      | 2.184(9)  | Nd(1)-N(7)#2      | 2.579(7) |
|                 |           | N(1)-Nd(1)        | 2.622(6) |
| N(1)-C(1)-Mo(1) | 178.5(7)  | C(5)-N(7)-Nd(1)#1 | 172.1(6) |
| N(4)-C(2)-Mo(1) | 175.2(10) | O(5)-Nd(1)-O(3)   | 143.1(3) |
| N(3)-C(3)-Mo(1) | 178.9(9)  | O(5)-Nd(1)-O(4)   | 82.1(3)  |
| N(8)-C(4)-Mo(1) | 176.7(10) | O(3)-Nd(1)-O(4)   | 74.7(3)  |
| N(7)-C(5)-Mo(1) | 177.8(7)  | O(5)-Nd(1)-O(6)   | 77.5(2)  |
| N(5)-C(6)-Mo(1) | 177.1(11) | O(3)-Nd(1)-O(6)   | 121.0(3) |
| N(2)-C(7)-Mo(1) | 179.0(13) | O(4)-Nd(1)-O(6)   | 73.4(2)  |
| C(6)-Mo(1)-C(4) | 110.7(4)  | O(5)-Nd(1)-O(1)   | 75.3(2)  |
| C(6)-Mo(1)-C(2) | 141.0(4)  | O(3)-Nd(1)-O(1)   | 137.9(3) |
| C(4)-Mo(1)-C(2) | 79.5(4)   | O(4)-Nd(1)-O(1)   | 143.3(2) |
| C(6)-Mo(1)-C(5) | 73.5(4)   | O(6)-Nd(1)-O(1)   | 73.7(2)  |
| C(4)-Mo(1)-C(5) | 73.3(3)   | O(5)-Nd(1)-O(2)   | 107.4(3) |
| C(2)-Mo(1)-C(5) | 143.0(3)  | O(3)-Nd(1)-O(2)   | 77.8(3)  |
| C(6)-Mo(1)-C(1) | 79.7(4)   | O(4)-Nd(1)-O(2)   | 143.5(3) |
| C(4)-Mo(1)-C(1) | 141.4(3)  | O(6)-Nd(1)-O(2)   | 142.5(3) |
| C(2)-Mo(1)-C(1) | 71.4(3)   | O(1)-Nd(1)-O(2)   | 72.0(3)  |
| C(5)-Mo(1)-C(1) | 143.0(3)  | O(5)-Nd(1)-N(7)#2 | 142.9(2) |
| C(6)-Mo(1)-C(3) | 142.5(4)  | O(3)-Nd(1)-N(7)#2 | 73.4(2)  |
| C(4)-Mo(1)-C(3) | 78.6(4)   | O(4)-Nd(1)-N(7)#2 | 111.3(2) |
| C(2)-Mo(1)-C(3) | 75.4(4)   | O(6)-Nd(1)-N(7)#2 | 74.0(2)  |
| C(5)-Mo(1)-C(3) | 74.9(3)   | O(1)-Nd(1)-N(7)#2 | 74.3(2)  |
| C(1)-Mo(1)-C(3) | 116.4(3)  | O(2)-Nd(1)-N(7)#2 | 82.6(3)  |
| C(6)-Mo(1)-C(8) | 72.4(4)   | O(5)-Nd(1)-N(1)   | 72.4(2)  |
| C(4)-Mo(1)-C(8) | 72.1(3)   | O(3)-Nd(1)-N(1)   | 74.3(3)  |
| C(2)-Mo(1)-C(8) | 75.7(4)   | O(4)-Nd(1)-N(1)   | 75.9(2)  |
| C(5)-Mo(1)-C(8) | 117.6(3)  | O(6)-Nd(1)-N(1)   | 139.3(2) |

|                 |          |                   |          |
|-----------------|----------|-------------------|----------|
| C(1)-Mo(1)-C(8) | 76.4(3)  | O(1)-Nd(1)-N(1)   | 122.4(3) |
| C(3)-Mo(1)-C(8) | 141.9(3) | O(2)-Nd(1)-N(1)   | 74.0(3)  |
| C(6)-Mo(1)-C(7) | 79.7(4)  | N(7)#2-Nd(1)-N(1) | 143.3(2) |
| C(4)-Mo(1)-C(7) | 144.1(4) | C(17)-O(1)-Nd(1)  | 134.9(7) |
| C(2)-Mo(1)-C(7) | 114.6(4) | C(22)-O(2)-Nd(1)  | 140.9(7) |
| C(5)-Mo(1)-C(7) | 77.4(3)  | C(23)-O(3)-Nd(1)  | 145.5(9) |
| C(1)-Mo(1)-C(7) | 73.1(4)  | C(26)-O(4)-Nd(1)  | 136.0(6) |
| C(3)-Mo(1)-C(7) | 74.0(4)  | C(11)-O(5)-Nd(1)  | 159.4(7) |
| C(8)-Mo(1)-C(7) | 141.7(4) | C(14)-O(6)-Nd(1)  | 127.3(8) |
| C(1)-N(1)-Nd(1) | 169.8(8) |                   |          |

Symmetry transformations used to generate equivalent atoms: #1 x, y, z-1; #2 x, y, z+1.

### Complex 3

|                 |           |                   |           |
|-----------------|-----------|-------------------|-----------|
| C(1)-Mo(1)      | 2.184(11) | N(6)-Sm(1)#1      | 2.562(9)  |
| C(2)-Mo(1)      | 2.178(14) | O(1)-Sm(1)        | 2.408(8)  |
| C(3)-Mo(1)      | 2.154(15) | O(2)-Sm(1)        | 2.372(8)  |
| C(4)-Mo(1)      | 2.181(13) | O(3)-Sm(1)        | 2.325(9)  |
| C(5)-Mo(1)      | 2.173(15) | O(4)-Sm(1)        | 2.328(10) |
| C(6)-Mo(1)      | 2.204(10) | O(5)-Sm(1)        | 2.340(10) |
| C(7)-Mo(1)      | 2.158(13) | O(6)-Sm(1)        | 2.367(8)  |
| C(8)-Mo(1)      | 2.207(13) | Sm(1)-N(6)#2      | 2.562(9)  |
|                 |           | N(1)-Sm(1)        | 2.515(9)  |
| N(1)-C(1)-Mo(1) | 179.2(11) | C(1)-N(1)-Sm(1)   | 172.7(9)  |
| N(3)-C(2)-Mo(1) | 175.9(15) | C(6)-N(6)-Sm(1)#1 | 173.8(9)  |
| N(2)-C(3)-Mo(1) | 175.0(16) | C(10)-O(1)-Sm(1)  | 132.2(8)  |
| N(4)-C(4)-Mo(1) | 178.3(15) | C(9)-O(2)-Sm(1)   | 134.8(10) |
| N(5)-C(5)-Mo(1) | 177.6(15) | C(16)-O(3)-Sm(1)  | 138.1(10) |
| N(6)-C(6)-Mo(1) | 176.6(10) | C(21)-O(4)-Sm(1)  | 143.1(14) |
| N(8)-C(7)-Mo(1) | 178.9(12) | C(23)-O(5)-Sm(1)  | 150.3(15) |
| N(7)-C(8)-Mo(1) | 176.3(13) | C(11)-O(6)-Sm(1)  | 137.5(9)  |
| C(3)-Mo(1)-C(7) | 112.0(6)  | O(3)-Sm(1)-O(4)   | 77.2(5)   |
| C(3)-Mo(1)-C(5) | 71.5(6)   | O(3)-Sm(1)-O(5)   | 140.1(4)  |
| C(7)-Mo(1)-C(5) | 74.7(6)   | O(4)-Sm(1)-O(5)   | 73.2(5)   |
| C(3)-Mo(1)-C(2) | 79.4(7)   | O(3)-Sm(1)-O(6)   | 109.6(4)  |
| C(7)-Mo(1)-C(2) | 141.2(6)  | O(4)-Sm(1)-O(6)   | 145.8(4)  |
| C(5)-Mo(1)-C(2) | 141.6(6)  | O(5)-Sm(1)-O(6)   | 82.6(4)   |
| C(3)-Mo(1)-C(4) | 81.1(5)   | O(3)-Sm(1)-O(2)   | 79.3(4)   |
| C(7)-Mo(1)-C(4) | 144.1(5)  | O(4)-Sm(1)-O(2)   | 73.4(4)   |
| C(5)-Mo(1)-C(4) | 78.7(6)   | O(5)-Sm(1)-O(2)   | 115.9(4)  |
| C(2)-Mo(1)-C(4) | 72.4(6)   | O(6)-Sm(1)-O(2)   | 140.2(3)  |
| C(3)-Mo(1)-C(1) | 72.3(5)   | O(3)-Sm(1)-O(1)   | 74.6(3)   |
| C(7)-Mo(1)-C(1) | 74.1(4)   | O(4)-Sm(1)-O(1)   | 139.6(4)  |
| C(5)-Mo(1)-C(1) | 117.4(5)  | O(5)-Sm(1)-O(1)   | 143.6(4)  |

|                 |          |                   |          |
|-----------------|----------|-------------------|----------|
| C(2)-Mo(1)-C(1) | 74.9(5)  | O(6)-Sm(1)-O(1)   | 72.1(3)  |
| C(4)-Mo(1)-C(1) | 140.9(5) | O(2)-Sm(1)-O(1)   | 73.5(3)  |
| C(3)-Mo(1)-C(6) | 140.9(5) | O(3)-Sm(1)-N(1)   | 144.4(3) |
| C(7)-Mo(1)-C(6) | 78.1(4)  | O(4)-Sm(1)-N(1)   | 114.3(4) |
| C(5)-Mo(1)-C(6) | 75.6(5)  | O(5)-Sm(1)-N(1)   | 73.7(3)  |
| C(2)-Mo(1)-C(6) | 117.2(5) | O(6)-Sm(1)-N(1)   | 80.2(3)  |
| C(4)-Mo(1)-C(6) | 72.1(4)  | O(2)-Sm(1)-N(1)   | 72.9(3)  |
| C(1)-Mo(1)-C(6) | 144.0(4) | O(1)-Sm(1)-N(1)   | 76.5(3)  |
| C(3)-Mo(1)-C(8) | 144.2(5) | O(3)-Sm(1)-N(6)#2 | 70.3(3)  |
| C(7)-Mo(1)-C(8) | 77.7(6)  | O(4)-Sm(1)-N(6)#2 | 75.7(4)  |
| C(5)-Mo(1)-C(8) | 142.2(5) | O(5)-Sm(1)-N(6)#2 | 76.8(4)  |
| C(2)-Mo(1)-C(8) | 73.7(6)  | O(6)-Sm(1)-N(6)#2 | 75.5(3)  |
| C(4)-Mo(1)-C(8) | 111.9(5) | O(2)-Sm(1)-N(6)#2 | 140.6(3) |
| C(1)-Mo(1)-C(8) | 78.2(5)  | O(1)-Sm(1)-N(6)#2 | 119.6(3) |
| C(6)-Mo(1)-C(8) | 73.9(4)  | N(1)-Sm(1)-N(6)#2 | 143.8(3) |

Symmetry transformations used to generate equivalent atoms: #1 x, y-1, z; #2 x, y+1, z.

#### Complex 4

|                 |           |                 |          |
|-----------------|-----------|-----------------|----------|
| C(1)-Mo(1)      | 2.136(12) | Eu(1)-O(4)      | 2.341(8) |
| C(2)-Mo(1)      | 2.160(12) | Eu(1)-O(2)      | 2.351(9) |
| C(3)-Mo(1)      | 2.174(13) | Eu(1)-O(5)      | 2.366(8) |
| C(4)-Mo(1)      | 2.188(11) | Eu(1)-O(6)      | 2.390(6) |
| C(5)-Mo(1)      | 2.136(13) | Eu(1)-O(1)      | 2.395(7) |
| C(6)-Mo(1)      | 2.157(12) | Eu(1)-N(4)#1    | 2.503(8) |
| C(7)-Mo(1)      | 2.203(12) | Eu(1)-N(1)      | 2.562(8) |
| C(8)-Mo(1)      | 2.158(10) | N(4)-Eu(1)#2    | 2.503(8) |
|                 |           | Eu(1)-O(3)      | 2.340(8) |
| N(8)-C(1)-Mo(1) | 179.0(14) | C(1)-Mo(1)-C(5) | 141.8(5) |
| N(3)-C(2)-Mo(1) | 177.2(13) | C(1)-Mo(1)-C(6) | 140.9(4) |
| N(5)-C(3)-Mo(1) | 177.1(12) | C(5)-Mo(1)-C(6) | 74.7(5)  |
| N(4)-C(4)-Mo(1) | 178.4(9)  | C(1)-Mo(1)-C(8) | 74.7(4)  |
| N(6)-C(5)-Mo(1) | 176.2(12) | C(5)-Mo(1)-C(8) | 117.1(4) |
| N(2)-C(6)-Mo(1) | 178.3(11) | C(6)-Mo(1)-C(8) | 73.9(4)  |
| N(7)-C(7)-Mo(1) | 175.8(13) | C(1)-Mo(1)-C(2) | 73.7(5)  |
| N(1)-C(8)-Mo(1) | 178.0(9)  | C(5)-Mo(1)-C(2) | 141.9(4) |
| O(3)-Eu(1)-O(4) | 77.5(4)   | C(6)-Mo(1)-C(2) | 77.9(5)  |
| O(3)-Eu(1)-O(2) | 74.6(4)   | C(8)-Mo(1)-C(2) | 79.0(4)  |
| O(4)-Eu(1)-O(2) | 140.9(3)  | C(1)-Mo(1)-C(3) | 71.3(5)  |
| O(3)-Eu(1)-O(5) | 73.2(3)   | C(5)-Mo(1)-C(3) | 80.2(5)  |
| O(4)-Eu(1)-O(5) | 78.6(3)   | C(6)-Mo(1)-C(3) | 145.4(4) |
| O(2)-Eu(1)-O(5) | 117.8(3)  | C(8)-Mo(1)-C(3) | 139.9(4) |
| O(3)-Eu(1)-O(6) | 140.6(3)  | C(2)-Mo(1)-C(3) | 110.5(5) |
| O(4)-Eu(1)-O(6) | 74.1(3)   | C(1)-Mo(1)-C(4) | 117.8(4) |
| O(2)-Eu(1)-O(6) | 142.3(3)  | C(5)-Mo(1)-C(4) | 75.4(4)  |

|                   |          |                   |           |
|-------------------|----------|-------------------|-----------|
| O(5)-Eu(1)-O(6)   | 74.9(3)  | C(6)-Mo(1)-C(4)   | 77.9(4)   |
| O(3)-Eu(1)-O(1)   | 144.8(3) | C(8)-Mo(1)-C(4)   | 143.9(3)  |
| O(4)-Eu(1)-O(1)   | 109.7(3) | C(2)-Mo(1)-C(4)   | 73.4(4)   |
| O(2)-Eu(1)-O(1)   | 80.2(3)  | C(3)-Mo(1)-C(4)   | 73.0(4)   |
| O(5)-Eu(1)-O(1)   | 141.4(2) | C(1)-Mo(1)-C(7)   | 78.5(5)   |
| O(6)-Eu(1)-O(1)   | 71.8(3)  | C(5)-Mo(1)-C(7)   | 72.0(5)   |
| O(3)-Eu(1)-N(4)#1 | 115.0(3) | C(6)-Mo(1)-C(7)   | 113.0(5)  |
| O(4)-Eu(1)-N(4)#1 | 144.3(3) | C(8)-Mo(1)-C(7)   | 72.5(4)   |
| O(2)-Eu(1)-N(4)#1 | 73.6(3)  | C(2)-Mo(1)-C(7)   | 144.4(4)  |
| O(5)-Eu(1)-N(4)#1 | 74.2(3)  | C(3)-Mo(1)-C(7)   | 80.3(4)   |
| O(6)-Eu(1)-N(4)#1 | 76.8(2)  | C(4)-Mo(1)-C(7)   | 140.7(4)  |
| O(1)-Eu(1)-N(4)#1 | 79.8(2)  | C(8)-N(1)-Eu(1)   | 171.7(7)  |
| O(3)-Eu(1)-N(1)   | 76.3(3)  | C(4)-N(4)-Eu(1)#2 | 172.6(8)  |
| O(4)-Eu(1)-N(1)   | 70.8(3)  | C(9)-O(1)-Eu(1)   | 139.2(7)  |
| O(2)-Eu(1)-N(1)   | 76.3(3)  | C(12)-O(2)-Eu(1)  | 149.1(11) |
| O(5)-Eu(1)-N(1)   | 140.5(3) | C(15)-O(3)-Eu(1)  | 144.2(11) |
| O(6)-Eu(1)-N(1)   | 117.9(3) | C(18)-O(4)-Eu(1)  | 142.6(11) |
| O(1)-Eu(1)-N(1)   | 74.2(2)  | C(22)-O(5)-Eu(1)  | 131.9(11) |
| N(4)#1-Eu(1)-N(1) | 143.0(3) | C(26)-O(6)-Eu(1)  | 131.6(7)  |

Symmetry transformations used to generate equivalent atoms: #1 x, y+1, z; #2 x, y-1, z.

### Complex 5

|                 |           |                 |          |
|-----------------|-----------|-----------------|----------|
| C(1)-Mo(1)      | 2.151(9)  | Gd(1)-O(1)      | 2.308(6) |
| C(2)-Mo(1)      | 2.149(10) | Gd(1)-O(3)      | 2.329(7) |
| C(3)-Mo(1)      | 2.160(10) | Gd(1)-O(6)      | 2.340(6) |
| C(4)-Mo(1)      | 2.160(8)  | Gd(1)-O(2)      | 2.354(6) |
| C(5)-Mo(1)      | 2.162(10) | Gd(1)-O(5)      | 2.363(6) |
| C(6)-Mo(1)      | 2.152(9)  | Gd(1)-O(4)      | 2.376(5) |
| C(7)-Mo(1)      | 2.159(9)  | Gd(1)-N(3)#1    | 2.522(7) |
| C(8)-Mo(1)      | 2.155(9)  | Gd(1)-N(8)      | 2.535(7) |
|                 |           | N(3)-Gd(1)#2    | 2.522(7) |
| N(3)-C(1)-Mo(1) | 178.6(7)  | C(2)-Mo(1)-C(1) | 74.2(3)  |
| N(2)-C(2)-Mo(1) | 177.1(10) | C(2)-Mo(1)-C(6) | 143.4(4) |
| N(7)-C(3)-Mo(1) | 179.9(12) | C(1)-Mo(1)-C(6) | 141.2(3) |
| N(8)-C(4)-Mo(1) | 176.7(6)  | C(2)-Mo(1)-C(8) | 111.2(4) |
| N(1)-C(5)-Mo(1) | 179.0(9)  | C(1)-Mo(1)-C(8) | 72.8(3)  |
| N(6)-C(6)-Mo(1) | 179.3(9)  | C(6)-Mo(1)-C(8) | 81.0(4)  |
| N(5)-C(7)-Mo(1) | 176.5(10) | C(2)-Mo(1)-C(7) | 141.8(4) |
| N(4)-C(8)-Mo(1) | 175.6(11) | C(1)-Mo(1)-C(7) | 74.3(3)  |
| O(1)-Gd(1)-O(3) | 74.1(3)   | C(6)-Mo(1)-C(7) | 73.0(4)  |
| O(1)-Gd(1)-O(6) | 78.1(3)   | C(8)-Mo(1)-C(7) | 79.1(4)  |
| O(3)-Gd(1)-O(6) | 141.1(3)  | C(2)-Mo(1)-C(3) | 73.2(4)  |
| O(1)-Gd(1)-O(2) | 73.1(2)   | C(1)-Mo(1)-C(3) | 117.2(3) |
| O(3)-Gd(1)-O(2) | 117.1(3)  | C(6)-Mo(1)-C(3) | 78.9(4)  |

|                   |          |                   |           |
|-------------------|----------|-------------------|-----------|
| O(6)-Gd(1)-O(2)   | 78.9(2)  | C(8)-Mo(1)-C(3)   | 71.3(4)   |
| O(1)-Gd(1)-O(5)   | 144.9(2) | C(7)-Mo(1)-C(3)   | 141.9(4)  |
| O(3)-Gd(1)-O(5)   | 80.7(3)  | C(2)-Mo(1)-C(4)   | 78.3(3)   |
| O(6)-Gd(1)-O(5)   | 109.4(2) | C(1)-Mo(1)-C(4)   | 143.8(3)  |
| O(2)-Gd(1)-O(5)   | 141.4(2) | C(6)-Mo(1)-C(4)   | 72.0(3)   |
| O(1)-Gd(1)-O(4)   | 140.9(3) | C(8)-Mo(1)-C(4)   | 140.4(3)  |
| O(3)-Gd(1)-O(4)   | 142.0(3) | C(7)-Mo(1)-C(4)   | 118.0(3)  |
| O(6)-Gd(1)-O(4)   | 74.5(2)  | C(3)-Mo(1)-C(4)   | 75.4(3)   |
| O(2)-Gd(1)-O(4)   | 74.7(2)  | C(2)-Mo(1)-C(5)   | 77.2(4)   |
| O(5)-Gd(1)-O(4)   | 71.9(2)  | C(1)-Mo(1)-C(5)   | 77.6(3)   |
| O(1)-Gd(1)-N(3)#1 | 114.8(3) | C(6)-Mo(1)-C(5)   | 113.2(4)  |
| O(3)-Gd(1)-N(3)#1 | 73.4(2)  | C(8)-Mo(1)-C(5)   | 145.1(3)  |
| O(6)-Gd(1)-N(3)#1 | 144.3(2) | C(7)-Mo(1)-C(5)   | 75.4(4)   |
| O(2)-Gd(1)-N(3)#1 | 74.0(2)  | C(3)-Mo(1)-C(5)   | 140.7(3)  |
| O(5)-Gd(1)-N(3)#1 | 79.8(2)  | C(4)-Mo(1)-C(5)   | 73.7(3)   |
| O(4)-Gd(1)-N(3)#1 | 76.2(2)  | C(1)-N(3)-Gd(1)#2 | 173.6(6)  |
| O(1)-Gd(1)-N(8)   | 76.4(2)  | C(4)-N(8)-Gd(1)   | 172.4(6)  |
| O(3)-Gd(1)-N(8)   | 76.7(2)  | C(14)-O(1)-Gd(1)  | 145.5(9)  |
| O(6)-Gd(1)-N(8)   | 70.6(2)  | C(21)-O(2)-Gd(1)  | 134.0(9)  |
| O(2)-Gd(1)-N(8)   | 140.5(2) | C(9)-O(3)-Gd(1)   | 169.2(14) |
| O(5)-Gd(1)-N(8)   | 74.3(2)  | C(18)-O(4)-Gd(1)  | 132.6(6)  |
| O(4)-Gd(1)-N(8)   | 118.6(2) | C(15)-O(5)-Gd(1)  | 140.5(6)  |
| N(3)#1-Gd(1)-N(8) | 143.1(2) | C(26)-O(6)-Gd(1)  | 142.0(8)  |

Symmetry transformations used to generate equivalent atoms: #1 x, y+1, z; #2 x, y-1, z.

### Complex 6

|                 |           |                 |          |
|-----------------|-----------|-----------------|----------|
| C(1)-Mo(1)      | 2.170(10) | Ho(1)-O(6)      | 2.281(7) |
| C(2)-Mo(1)      | 2.163(10) | Ho(1)-O(5)      | 2.300(6) |
| C(3)-Mo(1)      | 2.157(8)  | Ho(1)-O(1)      | 2.305(7) |
| C(4)-Mo(1)      | 2.166(10) | Ho(1)-O(4)      | 2.339(6) |
| C(5)-Mo(1)      | 2.151(10) | Ho(1)-O(3)      | 2.341(6) |
| C(6)-Mo(1)      | 2.156(9)  | Ho(1)-O(2)      | 2.346(6) |
| C(7)-Mo(1)      | 2.166(9)  | Ho(1)-N(5)#1    | 2.471(6) |
| C(8)-Mo(1)      | 2.167(10) | Ho(1)-N(1)      | 2.501(7) |
|                 |           | N(5)-Ho(1)#2    | 2.471(6) |
| N(7)-C(1)-Mo(1) | 176.9(10) | C(5)-Mo(1)-C(6) | 78.8(4)  |
| N(3)-C(2)-Mo(1) | 176.6(10) | C(5)-Mo(1)-C(3) | 116.5(3) |
| N(5)-C(3)-Mo(1) | 177.1(7)  | C(6)-Mo(1)-C(3) | 141.4(3) |
| N(4)-C(4)-Mo(1) | 178.4(12) | C(5)-Mo(1)-C(2) | 141.4(4) |
| N(8)-C(5)-Mo(1) | 179.3(11) | C(6)-Mo(1)-C(2) | 72.7(4)  |
| N(2)-C(6)-Mo(1) | 179.2(9)  | C(3)-Mo(1)-C(2) | 75.2(3)  |
| N(1)-C(7)-Mo(1) | 178.1(7)  | C(5)-Mo(1)-C(4) | 71.4(4)  |
| N(6)-C(8)-Mo(1) | 177.0(10) | C(6)-Mo(1)-C(4) | 80.7(4)  |

|                   |          |                   |           |
|-------------------|----------|-------------------|-----------|
| O(6)-Ho(1)-O(5)   | 78.2(3)  | C(3)-Mo(1)-C(4)   | 72.5(3)   |
| O(6)-Ho(1)-O(1)   | 74.4(3)  | C(2)-Mo(1)-C(4)   | 78.7(4)   |
| O(5)-Ho(1)-O(1)   | 140.6(3) | C(5)-Mo(1)-C(7)   | 75.6(3)   |
| O(6)-Ho(1)-O(4)   | 72.7(3)  | C(6)-Mo(1)-C(7)   | 71.4(3)   |
| O(5)-Ho(1)-O(4)   | 78.7(2)  | C(3)-Mo(1)-C(7)   | 144.5(3)  |
| O(1)-Ho(1)-O(4)   | 118.3(3) | C(2)-Mo(1)-C(7)   | 117.5(3)  |
| O(6)-Ho(1)-O(3)   | 140.1(3) | C(4)-Mo(1)-C(7)   | 140.1(3)  |
| O(5)-Ho(1)-O(3)   | 74.2(2)  | C(5)-Mo(1)-C(8)   | 73.8(4)   |
| O(1)-Ho(1)-O(3)   | 142.5(3) | C(6)-Mo(1)-C(8)   | 143.5(3)  |
| O(4)-Ho(1)-O(3)   | 74.1(2)  | C(3)-Mo(1)-C(8)   | 73.8(3)   |
| O(6)-Ho(1)-O(2)   | 145.7(3) | C(2)-Mo(1)-C(8)   | 141.9(3)  |
| O(5)-Ho(1)-O(2)   | 110.0(2) | C(4)-Mo(1)-C(8)   | 111.8(4)  |
| O(1)-Ho(1)-O(2)   | 79.9(3)  | C(7)-Mo(1)-C(8)   | 78.7(3)   |
| O(4)-Ho(1)-O(2)   | 140.9(2) | C(5)-Mo(1)-C(1)   | 141.3(3)  |
| O(3)-Ho(1)-O(2)   | 72.2(2)  | C(6)-Mo(1)-C(1)   | 112.7(4)  |
| O(6)-Ho(1)-N(5)#1 | 114.1(3) | C(3)-Mo(1)-C(1)   | 78.3(3)   |
| O(5)-Ho(1)-N(5)#1 | 144.6(2) | C(2)-Mo(1)-C(1)   | 75.2(4)   |
| O(1)-Ho(1)-N(5)#1 | 73.7(2)  | C(4)-Mo(1)-C(1)   | 144.9(4)  |
| O(4)-Ho(1)-N(5)#1 | 74.4(2)  | C(7)-Mo(1)-C(1)   | 74.0(3)   |
| O(3)-Ho(1)-N(5)#1 | 76.7(2)  | C(8)-Mo(1)-C(1)   | 77.3(4)   |
| O(2)-Ho(1)-N(5)#1 | 79.1(2)  | C(7)-N(1)-Ho(1)   | 172.5(6)  |
| O(6)-Ho(1)-N(1)   | 77.2(2)  | C(3)-N(5)-Ho(1)#2 | 174.2(6)  |
| O(5)-Ho(1)-N(1)   | 70.4(2)  | C(26)-O(1)-Ho(1)  | 158.1(12) |
| O(1)-Ho(1)-N(1)   | 76.2(3)  | C(21)-O(2)-Ho(1)  | 138.9(6)  |
| O(4)-Ho(1)-N(1)   | 140.4(2) | C(18)-O(3)-Ho(1)  | 131.5(6)  |
| O(3)-Ho(1)-N(1)   | 118.4(2) | C(17)-O(4)-Ho(1)  | 132.9(7)  |
| O(2)-Ho(1)-N(1)   | 74.8(2)  | C(11)-O(5)-Ho(1)  | 140.6(8)  |
| N(5)#1-Ho(1)-N(1) | 143.0(2) | C(14)-O(6)-Ho(1)  | 146.1(10) |

Symmetry transformations used to generate equivalent atoms: #1 x, y+1, z; #2 x, y-1, z.

#### Complex 7

|                  |           |                 |           |
|------------------|-----------|-----------------|-----------|
| C(1)-Mo(1)       | 2.153(15) | Er(1)-O(3)      | 2.265(12) |
| C(2)-Mo(1)       | 2.12(3)   | Er(1)-O(4)      | 2.275(15) |
| C(3)-Mo(1)       | 2.15(2)   | Er(1)-O(2)      | 2.309(11) |
| C(4)-Mo(1)       | 2.171(17) | Er(1)-O(5)      | 2.312(14) |
| C(5)-Mo(1)       | 2.16(2)   | Er(1)-O(1)      | 2.328(12) |
| C(6)-Mo(1)       | 2.195(17) | Er(1)-O(6)      | 2.353(13) |
| C(7)-Mo(1)       | 2.172(18) | Er(1)-N(10)#1   | 2.467(10) |
| C(8)-Mo(1)       | 2.172(14) | Er(1)-N(5)      | 2.483(10) |
|                  |           | N(10)-Er(1)#2   | 2.467(10) |
| N(10)-C(1)-Mo(1) | 176.4(13) | C(2)-Mo(1)-C(3) | 72.5(10)  |
| N(9)-C(2)-Mo(1)  | 176(3)    | C(2)-Mo(1)-C(1) | 72.5(8)   |
| N(11)-C(3)-Mo(1) | 176(2)    | C(3)-Mo(1)-C(1) | 117.8(7)  |
| N(7)-C(4)-Mo(1)  | 178(2)    | C(2)-Mo(1)-C(5) | 77.9(10)  |

|                    |           |                    |           |
|--------------------|-----------|--------------------|-----------|
| N(8)-C(5)-Mo(1)    | 175(2)    | C(3)-Mo(1)-C(5)    | 141.0(9)  |
| N(6)-C(6)-Mo(1)    | 174.9(15) | C(1)-Mo(1)-C(5)    | 75.1(7)   |
| N(12)-C(7)-Mo(1)   | 179.0(19) | C(2)-Mo(1)-C(4)    | 80.9(9)   |
| N(5)-C(8)-Mo(1)    | 178.2(14) | C(3)-Mo(1)-C(4)    | 78.8(9)   |
| O(3)-Er(1)-O(4)    | 71.8(7)   | C(1)-Mo(1)-C(4)    | 141.0(6)  |
| O(3)-Er(1)-O(2)    | 82.5(6)   | C(5)-Mo(1)-C(4)    | 71.8(8)   |
| O(4)-Er(1)-O(2)    | 145.0(5)  | C(2)-Mo(1)-C(8)    | 140.4(8)  |
| O(3)-Er(1)-O(5)    | 139.5(5)  | C(3)-Mo(1)-C(8)    | 74.3(6)   |
| O(4)-Er(1)-O(5)    | 76.7(7)   | C(1)-Mo(1)-C(8)    | 144.2(5)  |
| O(2)-Er(1)-O(5)    | 111.8(6)  | C(5)-Mo(1)-C(8)    | 118.2(7)  |
| O(3)-Er(1)-O(1)    | 145.2(5)  | C(4)-Mo(1)-C(8)    | 72.0(6)   |
| O(4)-Er(1)-O(1)    | 138.6(6)  | C(2)-Mo(1)-C(7)    | 112.0(9)  |
| O(2)-Er(1)-O(1)    | 74.5(5)   | C(3)-Mo(1)-C(7)    | 74.1(8)   |
| O(5)-Er(1)-O(1)    | 74.4(5)   | C(1)-Mo(1)-C(7)    | 73.8(5)   |
| O(3)-Er(1)-O(6)    | 114.6(5)  | C(5)-Mo(1)-C(7)    | 142.2(8)  |
| O(4)-Er(1)-O(6)    | 71.9(5)   | C(4)-Mo(1)-C(7)    | 144.2(7)  |
| O(2)-Er(1)-O(6)    | 142.3(4)  | C(8)-Mo(1)-C(7)    | 78.3(5)   |
| O(5)-Er(1)-O(6)    | 77.8(5)   | C(2)-Mo(1)-C(6)    | 144.5(9)  |
| O(1)-Er(1)-O(6)    | 73.4(5)   | C(3)-Mo(1)-C(6)    | 140.6(7)  |
| O(3)-Er(1)-N(10)#1 | 74.0(4)   | C(1)-Mo(1)-C(6)    | 77.9(5)   |
| O(4)-Er(1)-N(10)#1 | 115.4(5)  | C(5)-Mo(1)-C(6)    | 75.9(8)   |
| O(2)-Er(1)-N(10)#1 | 78.2(4)   | C(4)-Mo(1)-C(6)    | 112.5(7)  |
| O(5)-Er(1)-N(10)#1 | 144.4(4)  | C(8)-Mo(1)-C(6)    | 74.2(5)   |
| O(1)-Er(1)-N(10)#1 | 75.9(4)   | C(7)-Mo(1)-C(6)    | 77.0(7)   |
| O(6)-Er(1)-N(10)#1 | 75.2(4)   | C(8)-N(5)-Er(1)    | 175.3(13) |
| O(3)-Er(1)-N(5)    | 77.1(5)   | C(1)-N(10)-Er(1)#2 | 174.3(11) |
| O(4)-Er(1)-N(5)    | 75.7(5)   | C(12)-O(1)-Er(1)   | 132.2(12) |
| O(2)-Er(1)-N(5)    | 75.6(4)   | C(9)-O(2)-Er(1)    | 140.9(11) |
| O(5)-Er(1)-N(5)    | 70.8(5)   | C(24)-O(3)-Er(1)   | 153.3(18) |
| O(1)-Er(1)-N(5)    | 120.4(5)  | C(23)-O(4)-Er(1)   | 145(2)    |
| O(6)-Er(1)-N(5)    | 139.1(4)  | C(20)-O(5)-Er(1)   | 141.2(17) |
| N(10)#1-Er(1)-N(5) | 143.0(4)  | C(17)-O(6)-Er(1)   | 130.3(15) |

Symmetry transformations used to generate equivalent atoms: #1 x, y-1, z; #2 x, y+1, z.

### Complex 8

|            |           |              |          |
|------------|-----------|--------------|----------|
| C(1)-Mo(1) | 2.166(13) | N(4)-Tm(1)#1 | 2.492(9) |
| C(2)-Mo(1) | 2.173(13) | N(8)-Tm(1)   | 2.452(8) |
| C(3)-Mo(1) | 2.163(11) | O(1)-Tm(1)   | 2.333(7) |
| C(4)-Mo(1) | 2.170(12) | O(2)-Tm(1)   | 2.326(7) |
| C(5)-Mo(1) | 2.164(13) | O(3)-Tm(1)   | 2.286(8) |
| C(6)-Mo(1) | 2.175(12) | O(4)-Tm(1)   | 2.335(7) |
| C(7)-Mo(1) | 2.152(13) | O(5)-Tm(1)   | 2.286(8) |
| C(8)-Mo(1) | 2.166(10) | O(6)-Tm(1)   | 2.302(9) |
|            |           | Tm(1)-N(4)#2 | 2.493(9) |



|                 |           |                   |           |
|-----------------|-----------|-------------------|-----------|
| N(2)-C(1)-Mo(1) | 176.4(12) | C(8)-N(4)-Tm(1)#1 | 173.2(8)  |
| N(6)-C(2)-Mo(1) | 176.1(12) | C(3)-N(8)-Tm(1)   | 173.1(8)  |
| N(8)-C(3)-Mo(1) | 178.4(9)  | C(12)-O(1)-Tm(1)  | 131.0(7)  |
| N(7)-C(4)-Mo(1) | 175.9(12) | C(11)-O(2)-Tm(1)  | 140.0(7)  |
| N(1)-C(5)-Mo(1) | 179.0(14) | C(10)-O(3)-Tm(1)  | 140.7(9)  |
| N(5)-C(6)-Mo(1) | 179.6(13) | C(9)-O(4)-Tm(1)   | 132.5(9)  |
| N(3)-C(7)-Mo(1) | 177.5(14) | C(26)-O(5)-Tm(1)  | 144.6(11) |
| N(4)-C(8)-Mo(1) | 176.2(9)  | C(21)-O(6)-Tm(1)  | 154.6(15) |
| C(7)-Mo(1)-C(3) | 116.5(4)  | O(5)-Tm(1)-O(3)   | 78.1(4)   |
| C(7)-Mo(1)-C(5) | 71.1(5)   | O(5)-Tm(1)-O(6)   | 74.2(4)   |
| C(3)-Mo(1)-C(5) | 72.7(4)   | O(3)-Tm(1)-O(6)   | 140.3(3)  |
| C(7)-Mo(1)-C(8) | 76.2(4)   | O(5)-Tm(1)-O(2)   | 145.4(3)  |
| C(3)-Mo(1)-C(8) | 144.0(4)  | O(3)-Tm(1)-O(2)   | 110.5(3)  |
| C(5)-Mo(1)-C(8) | 140.5(4)  | O(6)-Tm(1)-O(2)   | 79.6(4)   |
| C(7)-Mo(1)-C(1) | 74.2(5)   | O(5)-Tm(1)-O(1)   | 139.8(3)  |
| C(3)-Mo(1)-C(1) | 74.1(4)   | O(3)-Tm(1)-O(1)   | 73.9(3)   |
| C(5)-Mo(1)-C(1) | 112.6(5)  | O(6)-Tm(1)-O(1)   | 143.0(3)  |
| C(8)-Mo(1)-C(1) | 78.1(4)   | O(2)-Tm(1)-O(1)   | 72.8(3)   |
| C(7)-Mo(1)-C(4) | 141.2(5)  | O(5)-Tm(1)-O(4)   | 72.6(3)   |
| C(3)-Mo(1)-C(4) | 75.3(4)   | O(3)-Tm(1)-O(4)   | 78.0(3)   |
| C(5)-Mo(1)-C(4) | 78.8(5)   | O(6)-Tm(1)-O(4)   | 118.8(4)  |
| C(8)-Mo(1)-C(4) | 117.1(4)  | O(2)-Tm(1)-O(4)   | 141.2(3)  |
| C(1)-Mo(1)-C(4) | 141.9(5)  | O(1)-Tm(1)-O(4)   | 73.7(3)   |
| C(7)-Mo(1)-C(2) | 141.8(4)  | O(5)-Tm(1)-N(8)   | 113.5(3)  |
| C(3)-Mo(1)-C(2) | 78.0(4)   | O(3)-Tm(1)-N(8)   | 144.8(3)  |
| C(5)-Mo(1)-C(2) | 144.6(4)  | O(6)-Tm(1)-N(8)   | 73.7(3)   |
| C(8)-Mo(1)-C(2) | 73.8(4)   | O(2)-Tm(1)-N(8)   | 79.4(3)   |
| C(1)-Mo(1)-C(2) | 76.9(5)   | O(1)-Tm(1)-N(8)   | 77.4(3)   |
| C(4)-Mo(1)-C(2) | 74.9(5)   | O(4)-Tm(1)-N(8)   | 74.7(3)   |
| C(7)-Mo(1)-C(6) | 78.6(5)   | O(5)-Tm(1)-N(4)#2 | 77.2(3)   |
| C(3)-Mo(1)-C(6) | 141.0(4)  | O(3)-Tm(1)-N(4)#2 | 71.0(3)   |
| C(5)-Mo(1)-C(6) | 80.0(5)   | O(6)-Tm(1)-N(4)#2 | 75.4(3)   |
| C(8)-Mo(1)-C(6) | 72.2(4)   | O(2)-Tm(1)-N(4)#2 | 74.6(3)   |
| C(1)-Mo(1)-C(6) | 143.6(4)  | O(1)-Tm(1)-N(4)#2 | 118.7(3)  |
| C(4)-Mo(1)-C(6) | 72.4(5)   | O(4)-Tm(1)-N(4)#2 | 140.3(3)  |
| C(2)-Mo(1)-C(6) | 113.3(5)  | N(8)-Tm(1)-N(4)#2 | 142.5(3)  |

Symmetry transformations used to generate equivalent atoms: #1 x, y-1, z; #2 x, y+1, z.

### Complex 9

|            |           |              |           |
|------------|-----------|--------------|-----------|
| C(1)-Mo(1) | 2.146(14) | N(1)-Yb(1)#1 | 2.422(9)  |
| C(2)-Mo(1) | 2.172(15) | N(8)-Yb(1)   | 2.505(10) |
| C(3)-Mo(1) | 2.169(11) | O(1)-Yb(1)   | 2.324(8)  |
| C(4)-Mo(1) | 2.169(14) | O(2)-Yb(1)   | 2.256(9)  |
| C(5)-Mo(1) | 2.152(15) | O(3)-Yb(1)   | 2.255(9)  |

|                 |           |                   |           |
|-----------------|-----------|-------------------|-----------|
| C(6)-Mo(1)      | 2.154(12) | O(4)-Yb(1)        | 2.252(10) |
| C(7)-Mo(1)      | 2.121(15) | O(5)-Yb(1)        | 2.302(8)  |
| C(8)-Mo(1)      | 2.158(14) | O(6)-Yb(1)        | 2.323(8)  |
|                 |           | Yb(1)-N(1)#2      | 2.422(9)  |
| N(3)-C(1)-Mo(1) | 175.6(15) | C(3)-N(1)-Yb(1)#1 | 172.4(8)  |
| N(4)-C(2)-Mo(1) | 177.6(12) | C(6)-N(8)-Yb(1)   | 174.3(9)  |
| N(1)-C(3)-Mo(1) | 178.5(10) | C(15)-O(1)-Yb(1)  | 133.8(9)  |
| N(6)-C(4)-Mo(1) | 179.4(12) | C(24)-O(2)-Yb(1)  | 140.3(9)  |
| N(2)-C(5)-Mo(1) | 177.9(12) | C(21)-O(3)-Yb(1)  | 144.6(12) |
| N(8)-C(6)-Mo(1) | 175.4(11) | C(18)-O(4)-Yb(1)  | 151.9(18) |
| N(7)-C(7)-Mo(1) | 179.1(15) | C(11)-O(5)-Yb(1)  | 140.3(8)  |
| N(5)-C(8)-Mo(1) | 178.2(12) | C(14)-O(6)-Yb(1)  | 131.1(8)  |
| C(7)-Mo(1)-C(1) | 72.0(5)   | O(4)-Yb(1)-O(3)   | 73.0(4)   |
| C(7)-Mo(1)-C(5) | 73.9(5)   | O(4)-Yb(1)-O(2)   | 139.3(4)  |
| C(1)-Mo(1)-C(5) | 114.1(6)  | O(3)-Yb(1)-O(2)   | 78.3(4)   |
| C(7)-Mo(1)-C(6) | 77.2(5)   | O(4)-Yb(1)-O(5)   | 81.4(4)   |
| C(1)-Mo(1)-C(6) | 141.3(5)  | O(3)-Yb(1)-O(5)   | 146.2(3)  |
| C(5)-Mo(1)-C(6) | 78.1(5)   | O(2)-Yb(1)-O(5)   | 110.0(3)  |
| C(7)-Mo(1)-C(8) | 79.6(6)   | O(4)-Yb(1)-O(6)   | 144.9(4)  |
| C(1)-Mo(1)-C(8) | 79.2(5)   | O(3)-Yb(1)-O(6)   | 138.9(4)  |
| C(5)-Mo(1)-C(8) | 144.1(5)  | O(2)-Yb(1)-O(6)   | 73.5(3)   |
| C(6)-Mo(1)-C(8) | 72.6(4)   | O(5)-Yb(1)-O(6)   | 73.0(3)   |
| C(7)-Mo(1)-C(4) | 142.1(5)  | O(4)-Yb(1)-O(1)   | 117.6(4)  |
| C(1)-Mo(1)-C(4) | 143.2(5)  | O(3)-Yb(1)-O(1)   | 72.0(3)   |
| C(5)-Mo(1)-C(4) | 76.4(5)   | O(2)-Yb(1)-O(1)   | 78.5(3)   |
| C(6)-Mo(1)-C(4) | 74.0(4)   | O(5)-Yb(1)-O(1)   | 141.1(3)  |
| C(8)-Mo(1)-C(4) | 113.7(5)  | O(6)-Yb(1)-O(1)   | 73.5(3)   |
| C(7)-Mo(1)-C(3) | 115.6(5)  | O(4)-Yb(1)-N(1)#2 | 74.2(3)   |
| C(1)-Mo(1)-C(3) | 72.7(4)   | O(3)-Yb(1)-N(1)#2 | 112.8(3)  |
| C(5)-Mo(1)-C(3) | 74.1(4)   | O(2)-Yb(1)-N(1)#2 | 144.9(3)  |
| C(6)-Mo(1)-C(3) | 143.8(4)  | O(5)-Yb(1)-N(1)#2 | 79.8(3)   |
| C(8)-Mo(1)-C(3) | 140.7(4)  | O(6)-Yb(1)-N(1)#2 | 77.8(3)   |
| C(4)-Mo(1)-C(3) | 77.4(4)   | O(1)-Yb(1)-N(1)#2 | 74.3(3)   |
| C(7)-Mo(1)-C(2) | 142.2(6)  | O(4)-Yb(1)-N(8)   | 75.6(3)   |
| C(1)-Mo(1)-C(2) | 78.1(6)   | O(3)-Yb(1)-N(8)   | 77.5(3)   |
| C(5)-Mo(1)-C(2) | 141.2(5)  | O(2)-Yb(1)-N(8)   | 70.5(3)   |
| C(6)-Mo(1)-C(2) | 116.3(5)  | O(5)-Yb(1)-N(8)   | 75.0(3)   |
| C(8)-Mo(1)-C(2) | 72.3(5)   | O(6)-Yb(1)-N(8)   | 118.7(3)  |
| C(4)-Mo(1)-C(2) | 74.1(5)   | O(1)-Yb(1)-N(8)   | 140.1(3)  |
| C(3)-Mo(1)-C(2) | 75.4(4)   | N(1)#2-Yb(1)-N(8) | 143.0(3)  |

Symmetry transformations used to generate equivalent atoms: #1 x, y-1, z; #2 x, y+1, z.

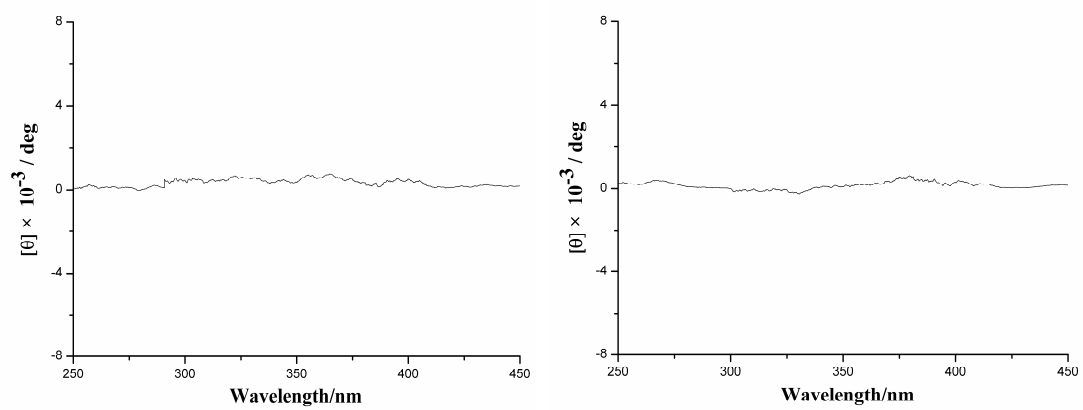

Fig. S1. CD spectra of powder samples of compounds **1** (left) and **2** (right).
